# Supplementary material for: Properties of Silicone Rubber-Based Composites Reinforced with Few-Layer Graphene and Iron Oxide or Titanium Dioxide
Source: MDPI journal article supplement (doi:10.3390/polym13101550), 2021-05-12
Supplement: s1 [file s1]

Supporting Information

**Properties of silicone rubber-based composites reinforced with few  
layer graphene and iron oxide or titanium di oxide**

Vineet Kumar<sup>a,#</sup>, Anuj Kumar<sup>b,#</sup>, Min-Seok Song<sup>a</sup>, Sung Soo Han<sup>b</sup>, Dong Joo Lee<sup>a</sup>,

Sang-Shin Park <sup>a\*</sup>

*<sup>a</sup>School of Mechanical Engineering, Yeungnam University, 280 Daehak-ro, Gyeongsan 38541,  
South Korea*

*<sup>b</sup>School of Chemical Engineering, Yeungnam University, 280 Daehak-ro, Gyeongsan 38541,  
South Korea*

<sup>#</sup>equal contribution

\*corresponding author - [pss@ynu.ac.kr](mailto:pss@ynu.ac.kr) (SS Park)

## Properties of filled RTV-SR composites

### Filler dispersions

Filler dispersions in RTV-SR composites at a loading of 20 phr were assessed by SEM (Figure S1) and by elemental mapping. Figure S1 shows that filler particles were uniformly dispersed in the RTV-SR matrix. In high-resolution SEM images, filler particles are indicated by arrows.

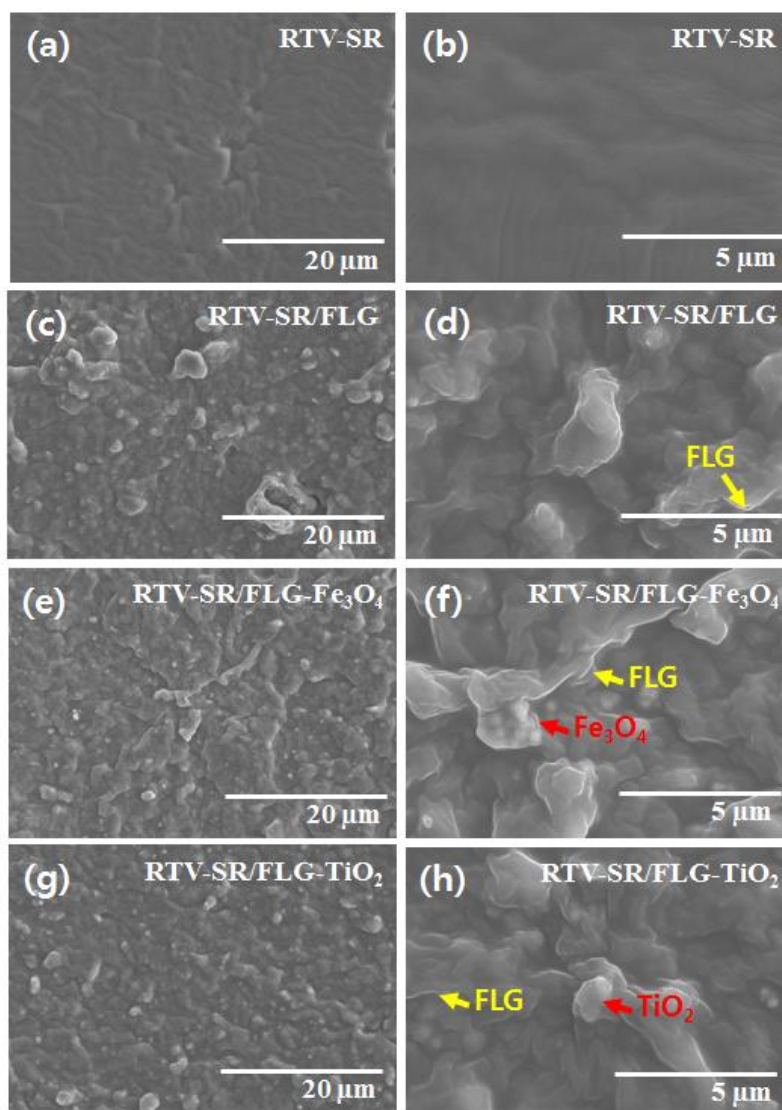

**Figure S1.** SEM micrographs at different resolutions at a filler loading of 20 phr: (a,b) unfilled RTV-SR matrix, (c,d) RTV-SR/FLG, (e,f) RTV-SR/FLG-Fe<sub>3</sub>O<sub>4</sub>, and (g,h) RTV-SR/FLG-TiO<sub>2</sub>
